# Supplementary material for: Single target acuity in the common sunfish (Lepomis gibbosus)
Source: Oxford University Press journal article supplement (doi:10.1242/jeb.243068), 2021-09-23
Supplement: jeb243068supp.pdf [file jeb243068supp.pdf]

**Table S1.** Threshold determinations for single target acuity with different contrast levels to background for each individual fish.

| Single target acuity [deg]<br>for single targets with Weber/Michelson contrast of<br>C1 = 0.98/0.97 |      |      |      |      |
|-----------------------------------------------------------------------------------------------------|------|------|------|------|
| Threshold determination                                                                             | 1    | 2    | 3    | 4    |
| Roy                                                                                                 | 0.24 | 0.13 | 0.13 | 0.16 |
| Hanna                                                                                               | 0.13 | 0.13 | 0.14 | 0.13 |
| Anna                                                                                                | 0.32 | 0.31 | 0.32 | 0.34 |
| Frida                                                                                               | 0.15 | 0.12 | 0.13 | 0.13 |
| Luigi                                                                                               | 0.17 | 0.19 | 0.19 | 0.19 |
| Lina                                                                                                | 0.15 | 0.12 | 0.12 | 0.12 |

  

| Single target acuity [deg]<br>for single targets with Weber/Michelson contrast of<br>C2 = 0.67/0.5 |      |      |      |      |      |
|----------------------------------------------------------------------------------------------------|------|------|------|------|------|
| Threshold determination                                                                            | 1    | 2    | 3    | 4    | 5    |
| Roy                                                                                                | 0.51 | 0.32 | 0.31 | 0.35 |      |
| Hanna                                                                                              | 0.40 | 0.36 | 0.36 | 0.34 | 0.35 |
| Anna                                                                                               | 0.35 | 0.34 | 0.37 | 0.36 |      |
| Frida                                                                                              | 0.65 | 0.36 | 0.33 | 0.37 |      |
| Luigi                                                                                              | 0.99 | 0.64 | 0.37 | 0.37 | 0.37 |
| Lina                                                                                               | 0.35 | 0.31 | 0.31 | 0.31 |      |

| Single target acuity [deg]                          |      |      |      |      |      |      |      |      |
|-----------------------------------------------------|------|------|------|------|------|------|------|------|
| for single targets with Weber/Michelson contrast of |      |      |      |      |      |      |      |      |
| C3 = 0.41/0.25                                      |      |      |      |      |      |      |      |      |
| Threshold                                           | 1    | 2    | 3    | 4    | 5    | 6    | 7    | 8    |
| Roy                                                 | 1.01 | 0.67 | 0.65 | 0.40 | 0.34 | 0.33 | 0.36 |      |
| Hanna                                               | 0.62 | 0.59 | 0.40 | 0.44 | 0.43 |      |      |      |
| Anna                                                | 0.55 | 0.48 | 0.45 | 0.50 | 0.56 |      |      |      |
| Frida                                               | 0.55 | 0.51 | 0.58 | 0.54 | 0.45 | 0.37 | 0.37 | 0.40 |
| Luigi                                               | 1.06 | 0.65 | 0.67 | 0.56 | 0.51 | 0.55 |      |      |
| Lina                                                | 0.55 | 0.34 | 0.32 | 0.34 |      |      |      |      |

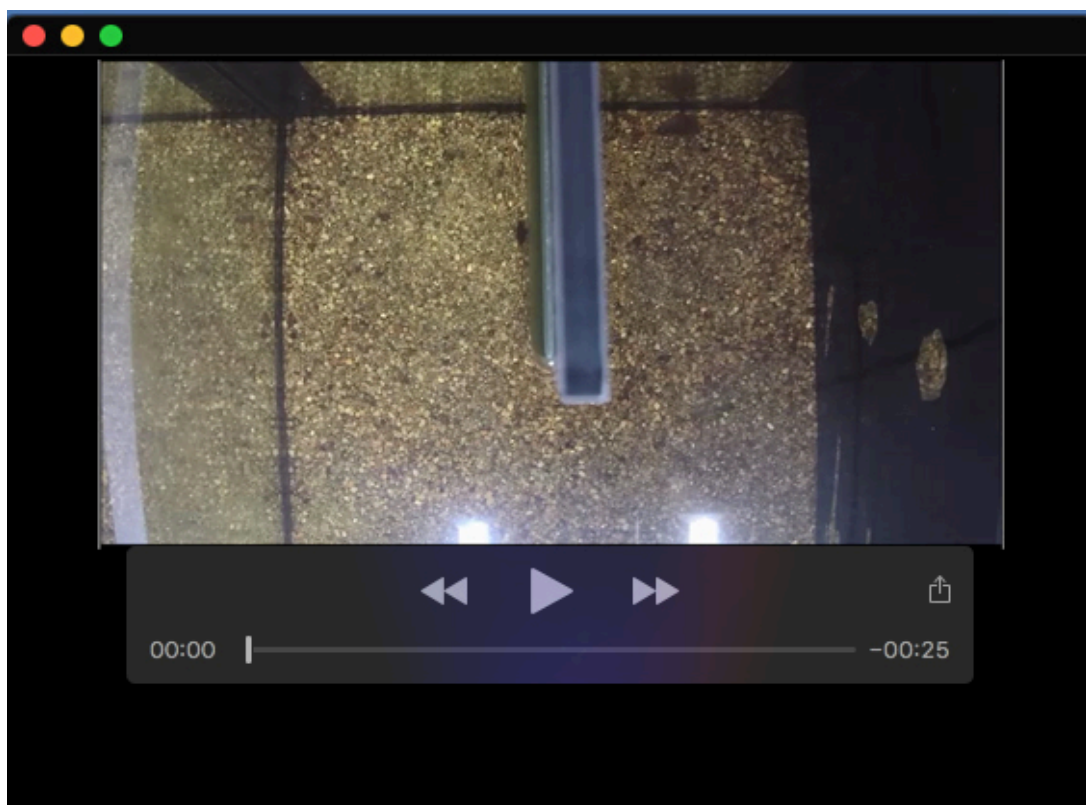

**Movie 1.** Experimental trials.
